# Supplementary material
Source: publisher site journal article supplement (https://www.dovepress.com/article/332489)
Supplement: Supplementary file 1 [file get_supplementary_file.php]

**Jimma University**

**Institute of Health**

**School of Pharmacy**

**Written Informed consent**

I want to thank you for taking the time to meet with me today. My name is ____________. I came from Jimma university institute of health Department of Pharmacy. I am the data collector for the study entitled “**Patients Satisfaction with Pharmaceutical care and Associated Factors in the Southwestern Ethiopia”**. The aim of this study is to assess the patients satisfaction with pharmaceutical care and associated actors in the Southwestern Ethiopia. Considering that the findings and recommendations emanated from this study will help policymakers and other organizations to design intervention activities thus you are kindly requested to participate in this study.

The interview will take less than an hour. Although I will be taking some notes during the session, I can’t possibly write fast enough to get it all down. Therefore, I will be taping the session because I don’t want to miss any of your comments. Because we’re on tape, please be sure to speak up so that I don’t miss your comments.

All responses will be kept confidential. This means that your interview responses will only be shared with research team members and we will ensure that any information we include in our report does not identify you as the respondent. Remember, you don’t have to talk about anything you don’t want to and you can stop the interview at any time.

Are you willing to participate in this interview? Yes ______ No ______

**Data Collection Format**

A questionnaire designed to assess the patient satisfaction and associated factor with pharmaceutical care among clients admitted to Medical ward at Jimma University Medical Center.

**Part I: Sociodemographic characteristics of patients**

1. Gender
2. Male b. female
3. Age______________years
4. Residence
5. Urban b. Rural
6. Marital status
7. Married b. Divorced c. Widowed d. Single
8. Educational level

a. No formal education b. Primary Education c. Secondary education d. College and above

1. Occupation
2. Government employee b. Private employee c. Daily laborer d. Farmer e. others_______-(specify)

**Part II: Patient and admission related characteristics**

1. Current diagnosis____________
2. History of previous admission
3. Yes b. No
4. Presence of co morbidities
5. Yes b. No
6. Presence of adverse drug effect
7. Yes b. No
8. Number of medications per day_____________
9. Length of hospital stay in weeks ____________
10. Was particular clinical pharmacy heir to care you?
11. Yes b. No
12. Who supports you?
13. Parent’s b. Self c. Spouse d. Others_____specify

**Part III: Prevalence, types and causes of drug therapy problem**

1. Is DTP identified documented?
2. Yes b. No
3. If question number 14 yes, which type of DTP identified? If No, go to question number 19
4. Un necessary drug therapy
5. Needs additional drug therapy
6. Needs different drug product
7. Dosage too low
8. ADR
9. Dosage too high
10. Non adherence
11. Is intervention documented for identified DTP?
12. Yes b. No
13. If question number 17 yes, list the causes of DTP?
14. _______________
15. _______________
16. _______________
17. _______________

**Part IV: - Evaluation of the patient satisfaction using five Likert scale**

| S/N | Level of satisfaction assessment questions | Response | | | | |
| --- | --- | --- | --- | --- | --- | --- |
| VS | S | N | D | VD |
| 1 | How much you are satisfied with medication reconciliation services (list of medication including vitamins, supplements, herbal and traditional medicines), route, indication, instructions) provided by pharmacists? |  |  |  |  |  |
| 2 | How much you satisfied with pharmacist’s action to assess duplications or potential interactions of medication? |  |  |  |  |  |
| 3 | How much you satisfied with medication changes, the reason for the change, counsel regarding new medications by pharmacists? |  |  |  |  |  |
| 4 | How much you satisfied with counseling of Pharmacists on storage condition of drugs and instructions to use them |  |  |  |  |  |
| 5 | How much you satisfied with recommendation of Pharmacists on lifestyle modification? |  |  |  |  |  |
| 6 | How much you satisfied with effort of pharmacist to encourage you on adherence using special tools, logs, devices, booklets, and brochures? |  |  |  |  |  |
| 7 | How much you satisfied with time you spent with pharmacists? |  |  |  |  |  |

THANKS!!!!!!!!!!!!!!!!!!
